# Supplementary material
Source: publisher figshare collection journal article supplement (https://sage.figshare.com/ndownloader/files/17990417)
Supplement: Supplementary file 1 [file 17990417]

# **Experimental Study of the Pomelo Peel Powder as Novel Shale**

## **Inhibitor in Water-based Drilling Fluids**

Lei Zhang<sup>1</sup>, Xiaoming Wu<sup>1</sup>, Yujie Sun<sup>2</sup>, Jihua Cai<sup>1</sup>, Shuaifeng Lyu<sup>3\*</sup>

(Faculty of Engineering, *China University of Geosciences, Wuhan 430074, P.R.China*; *Drilling Technology Research Institute of Xibu Drilling Engineering Company Limited, CNPC, Wulumuqi 830000, P.R. China*; *Faculty of Earth Resources, China University of Geosciences, Wuhan 430074, P.R. China*)

### **\*Corresponding author:**

Shuaifeng Lyu

Phone number: +8613343407981

Email: lyusf@cug.edu.cn

Address: Faculty of Earth Resources, China University of Geosciences (Wuhan),  
No.388 Lumo Road, Hongshan District, Wuhan, P.R. China.
